# Supplementary material for: FAM83H-AS1 is a potential modulator of cancer driver genes across different tumors and a prognostic marker for ER/PR + BRCA patients
Source: PubMed Central journal article supplement (PMC7445275; doi:10.1038/s41598-020-71062-2), 2020-08-24

**FAM83H-AS1 is a potential modulator of cancer driver genes across different tumors and a prognostic marker for ER/PR+ BRCA patients**

Ríos-Romero Magdalena, Cedro-Tanda Alberto, Peña-Luna Monica, Mancera-Rodríguez Marco, Hidalgo-Pérez Lizbett<sup>1</sup>, Cisneros-Villanueva Mireya, Beltrán-Anaya Fredy Omar, Arellano-Llamas Rocío, Jiménez-Morales Silvia, Alfaro-Ruiz Luis Alberto, Tenorio-Torres Alberto, Domínguez-Reyes Carlos, Villegas-Carlos Felipe, Ochoa-Mendoza Elsa, Hidalgo-Miranda Alfredo.

Ríos-Romero M, *et al.*, 2020. FAM83H-AS1 is a potential modulator of cancer driver genes across different tumors and a prognostic marker for positive ER/PR receptor breast cancer patients

**Supplementary table 1.** Cox regression analysis for PR positive breast cancer TCGA cohort

|                       | 95.0% CI for Exp(B) |       |       |    |       |        |       |       |
|-----------------------|---------------------|-------|-------|----|-------|--------|-------|-------|
|                       | B                   | SE    | Wald  | df | Sig.  | Exp(B) | Lower | Upper |
| FAM83H-AS1 expression | 0.435               | 0.22  | 3.93  | 1  | 0.047 | 1.545  | 1.005 | 2.376 |
| Other                 |                     |       | 6.699 | 2  | 0.035 |        |       |       |
| PR (Positive)         | 0.432               | 0.221 | 3.832 | 1  | 0.05  | 1.541  | 0.999 | 2.375 |
| PR (Negative)         | 0.981               | 0.477 | 4.23  | 1  | 0.04  | 2.666  | 1.047 | 6.787 |

**Supplementary table 2.** Cox regression analysis for ER positive breast cancer TCGA cohort

|                             | 95.0% CI for Exp(B) |       |       |    |       |        |       |       |
|-----------------------------|---------------------|-------|-------|----|-------|--------|-------|-------|
|                             | B                   | SE    | Wald  | df | Sig.  | Exp(B) | Lower | Upper |
| FAM83HAS1 median expression | 0.411               | 0.218 | 3.569 | 1  | 0.059 | 1.508  | 0.985 | 2.31  |
| Other                       |                     |       | 9.649 | 2  | 0.008 |        |       |       |
| ER (Positive)               | 0.299               | 0.239 | 1.571 | 1  | 0.21  | 1.349  | 0.845 | 2.154 |
| ER (Negative)               | 1.305               | 0.433 | 9.089 | 1  | 0.003 | 3.689  | 1.579 | 8.618 |

Ríos-Romero M, *et al.*, 2020. FAM83H-AS1 is a potential modulator of cancer driver genes across different tumors and a prognostic marker for positive ER/PR receptor breast cancer patients

**Supplementary table 3.** Tumor and normal sample sizes used in the TCGA analyses

| Cancer type | Sample size |     |
|-------------|-------------|-----|
|             | T           | N   |
| ACC         | 77          | 128 |
| BLCA        | 404         | 28  |
| BRCA        | 1085        | 291 |
| CESC        | 306         | 13  |
| CHOL        | 36          | 9   |
| COAD        | 275         | 349 |
| DLBC        | 47          | 337 |
| ESCA        | 181         | 286 |
| GBM         | 163         | 207 |
| HNSC        | 519         | 44  |
| KICH        | 66          | 53  |
| KIRC        | 523         | 100 |
| KIRP        | 286         | 60  |
| LAML        | 173         | 70  |
| LGG         | 518         | 207 |
| LIHC        | 369         | 160 |
| LUAD        | 483         | 347 |
| LUSC        | 486         | 338 |
| MESO        | 87          | NA  |
| OV          | 426         | 88  |
| PAAD        | 179         | 171 |
| PCPG        | 182         | 3   |
| PRAD        | 492         | 152 |
| READ        | 92          | 318 |
| SARC        | 262         | 2   |
| SKCM        | 461         | 558 |
| STAD        | 408         | 211 |
| TGCT        | 137         | 165 |
| THCA        | 512         | 337 |
| THYM        | 118         | 339 |
| UCEC        | 174         | 91  |
| UCS         | 57          | 78  |
| UVM         | 79          | NA  |

Ríos-Romero M, *et al.*, 2020. FAM83H-AS1 is a potential modulator of cancer driver genes across different tumors and a prognostic marker for positive ER/PR receptor breast cancer patients

**Supplementary figure 1.** Survival curve for TCGA BRCA PR negative patients

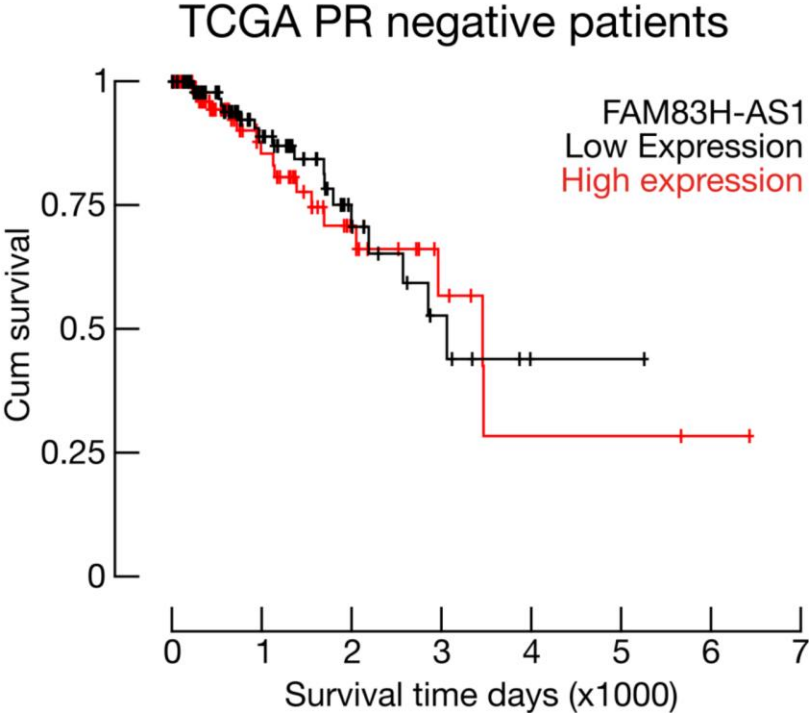

Ríos-Romero M, *et al.*, 2020. FAM83H-AS1 is a potential modulator of cancer driver genes across different tumors and a prognostic marker for positive ER/PR receptor breast cancer patients

**Supplementary figure 2.** Survival curve for TCGA BRCA ER negative patients

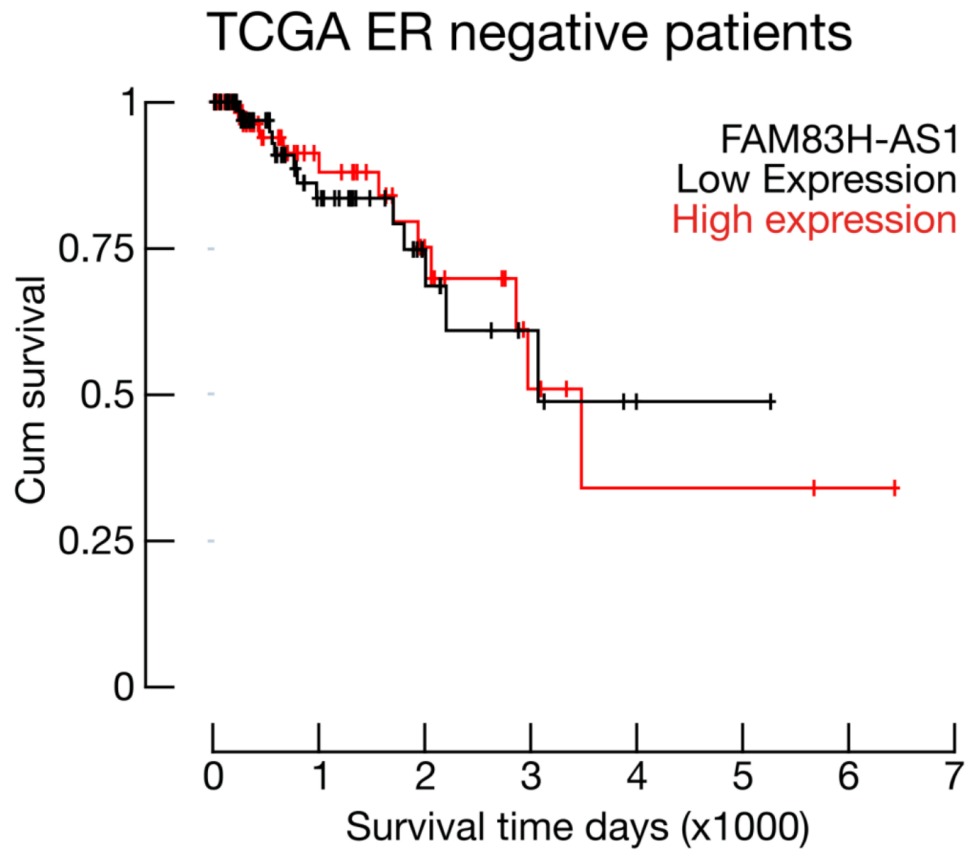

Ríos-Romero M, *et al.*, 2020. FAM83H-AS1 is a potential modulator of cancer driver genes across different tumors and a prognostic marker for positive ER/PR receptor breast cancer patients

**Supplementary figure 3.** Survival curve for TCGA SKCM patients

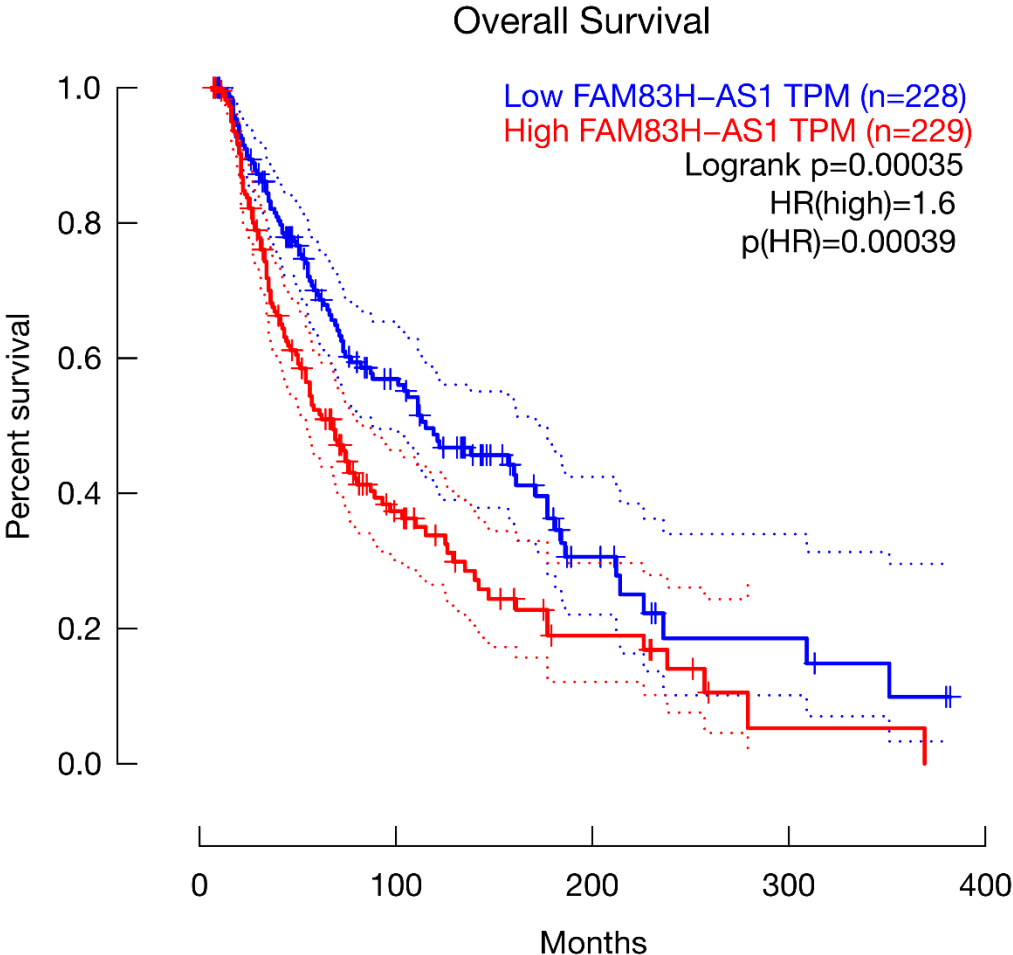

Ríos-Romero M, *et al.*, 2020. FAM83H-AS1 is a potential modulator of cancer driver genes across different tumors and a prognostic marker for positive ER/PR receptor breast cancer patients

**Supplementary figure 4.** FAM83H-AS1 is located both in the nucleus and cytoplasm in MCF7 cells

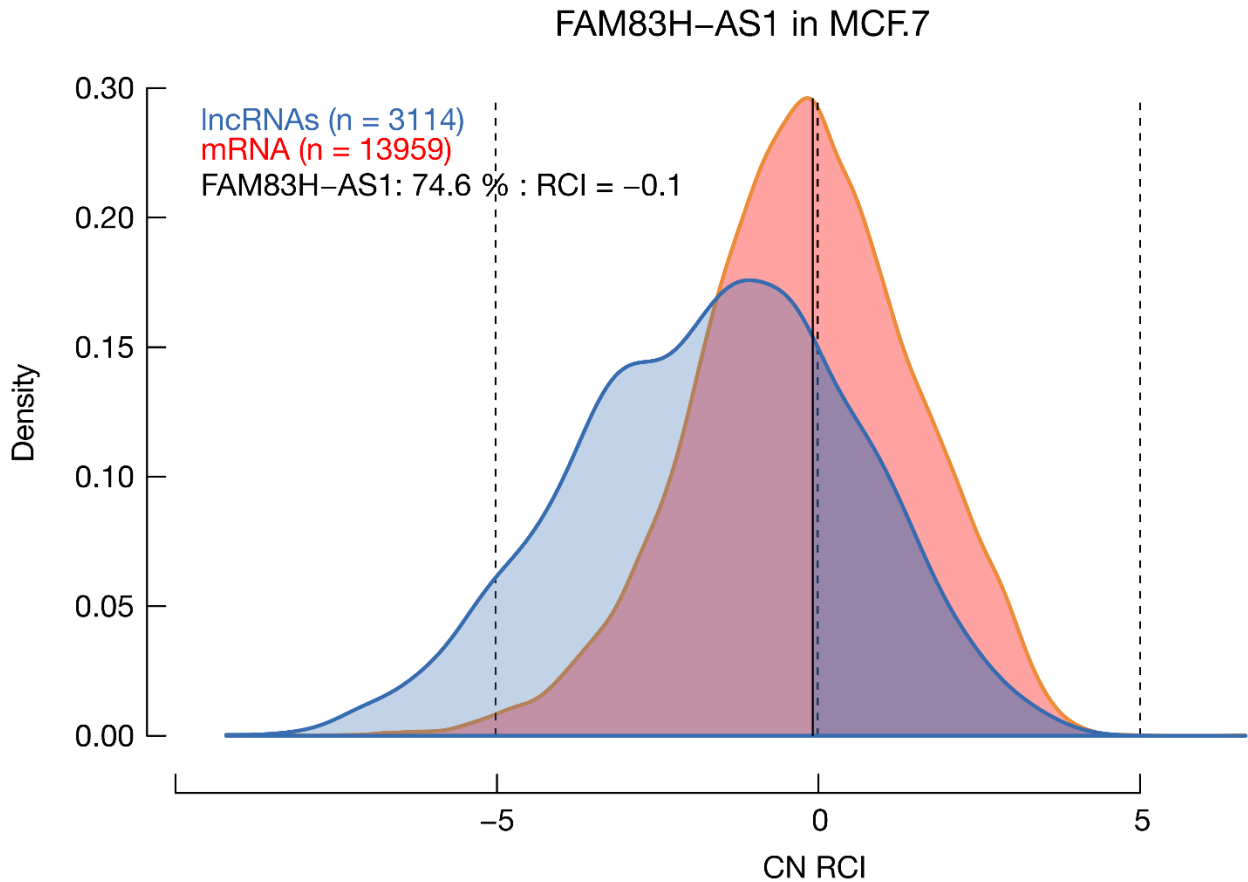

Ríos-Romero M, *et al.*, 2020. FAM83H-AS1 is a potential modulator of cancer driver genes across different tumors and a prognostic marker for positive ER/PR receptor breast cancer patients

**Supplementary figure 4.** FAM83H-AS1 is not involved in invasion in ER/PR positive MCF7 cells

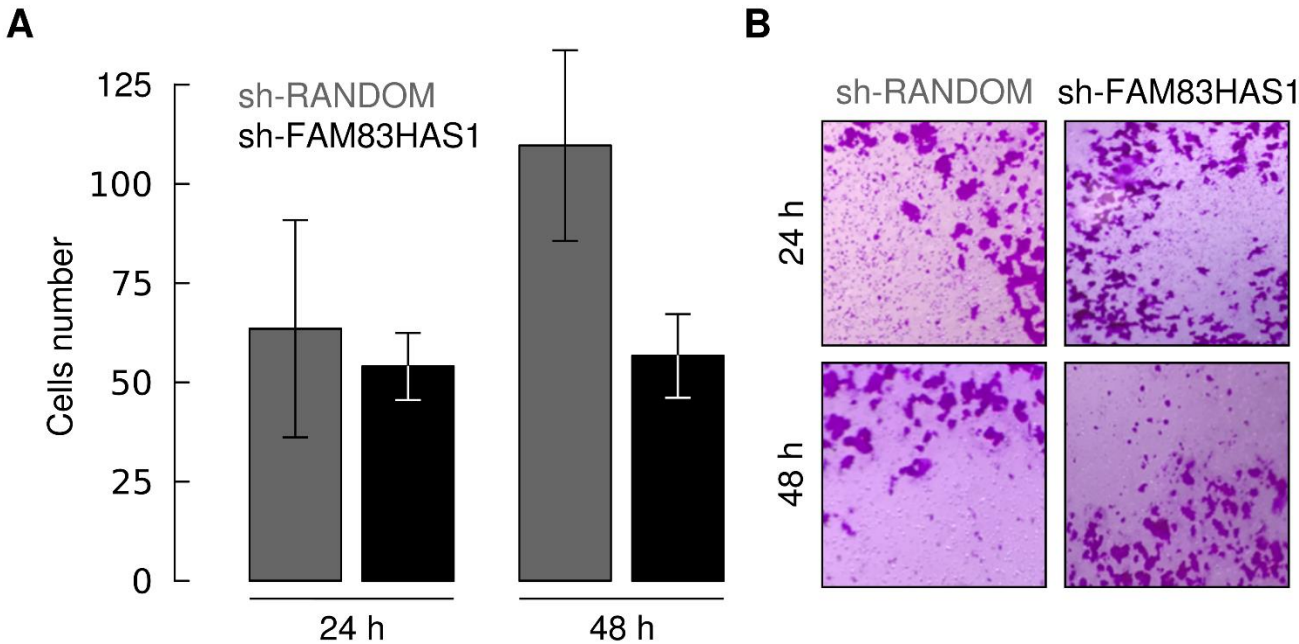

Supplement: 41598_2020_71062_MOESM1_ESM.pdf [file 41598_2020_71062_MOESM1_ESM.pdf]
